# Supplementary material for: Epoxidation of Kraft Lignin as a Tool for Improving the Mechanical Properties of Epoxy Adhesive
Source: PubMed Central journal article supplement (PMC7321300; doi:10.3390/molecules25112513), 2020-05-28

## Supplementary Information:

Fitting of all curves from Figure 6 b:

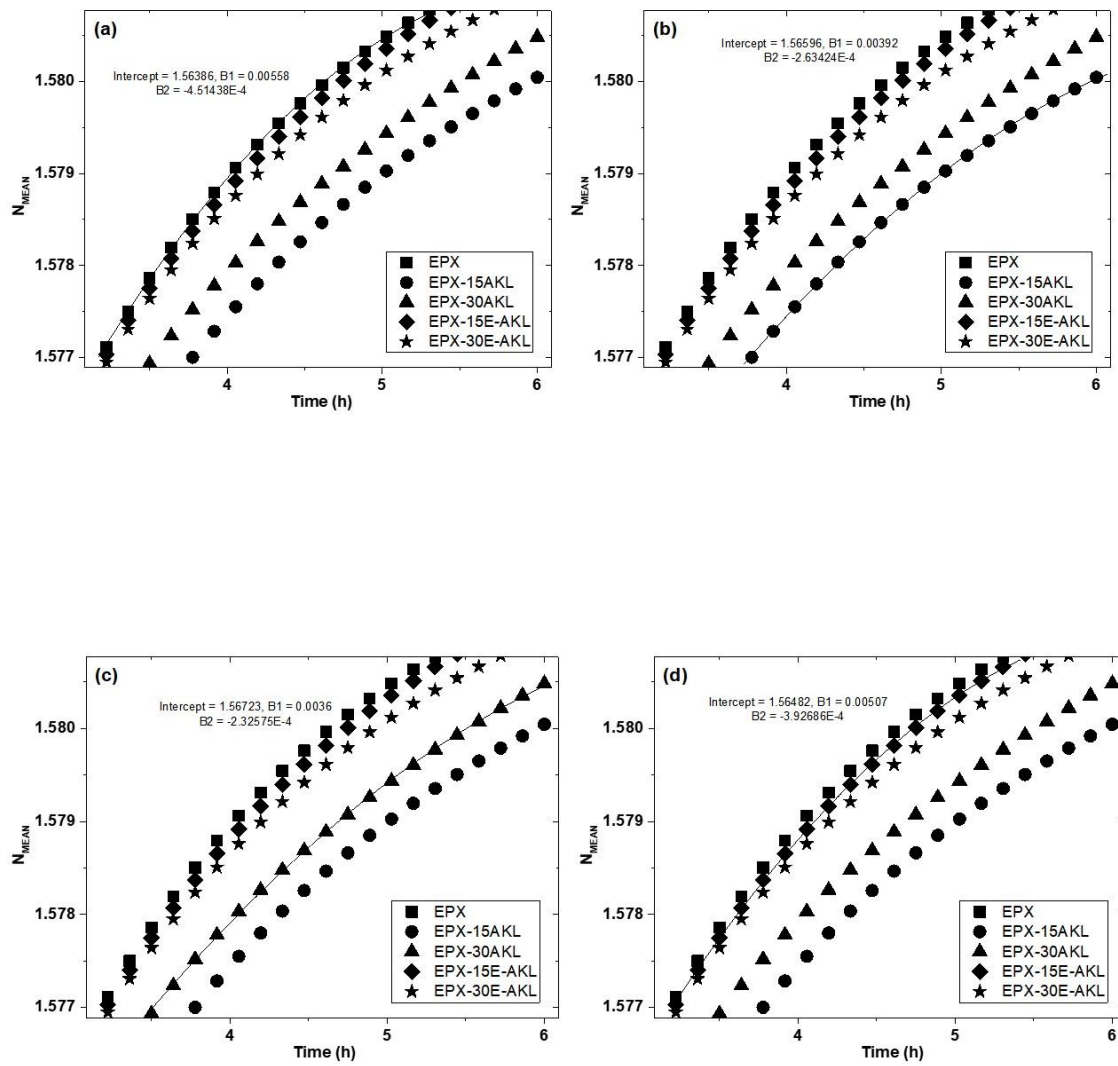

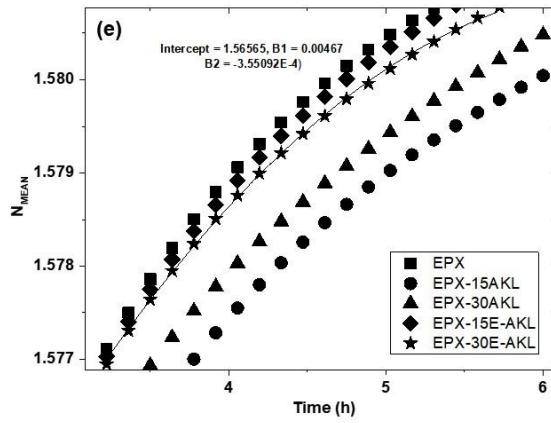

Fitting of all curves from Figure6 c:

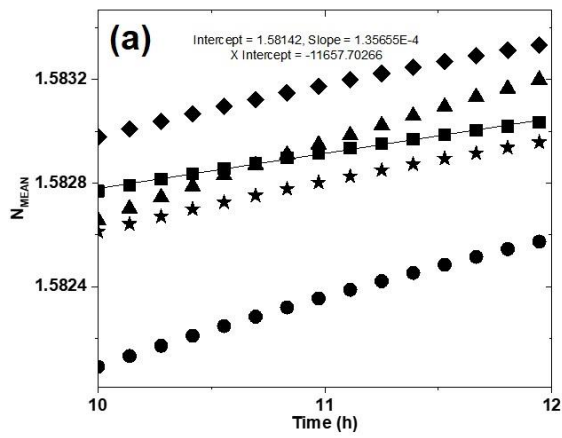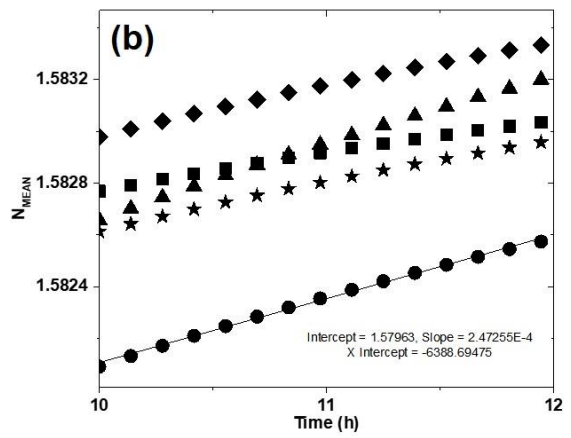

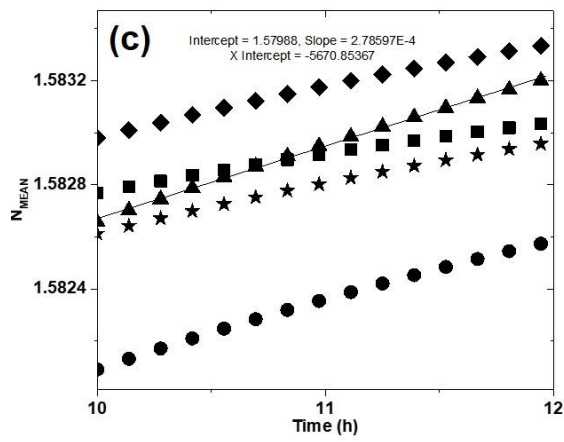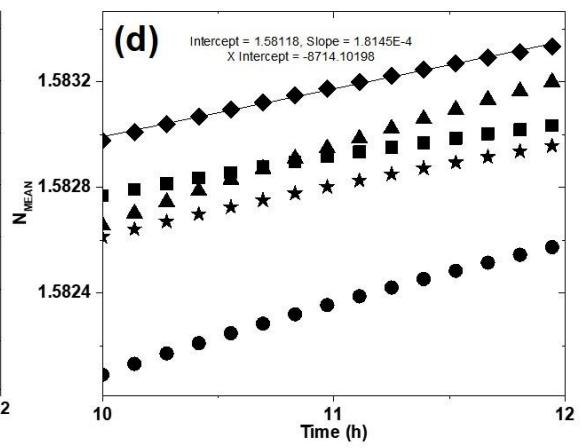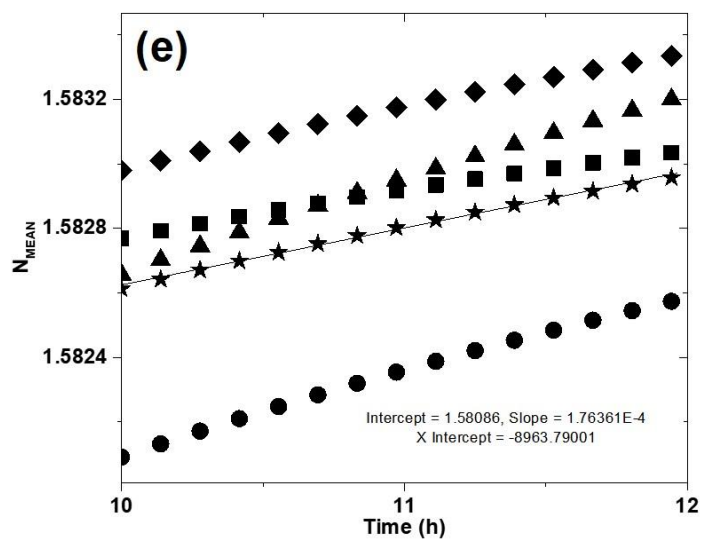

Fitting of all curves from Figure7 b:

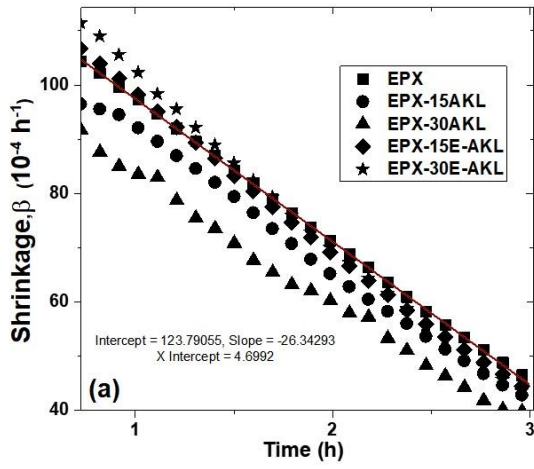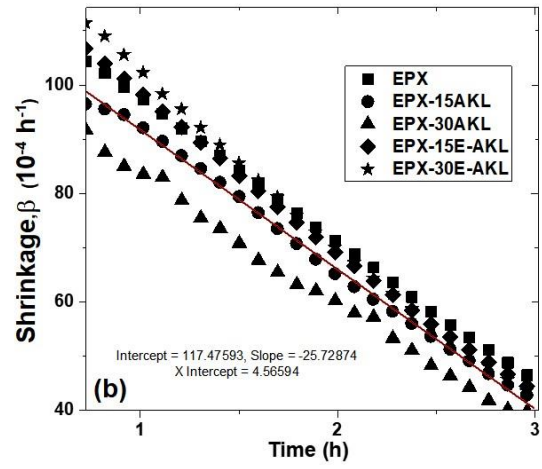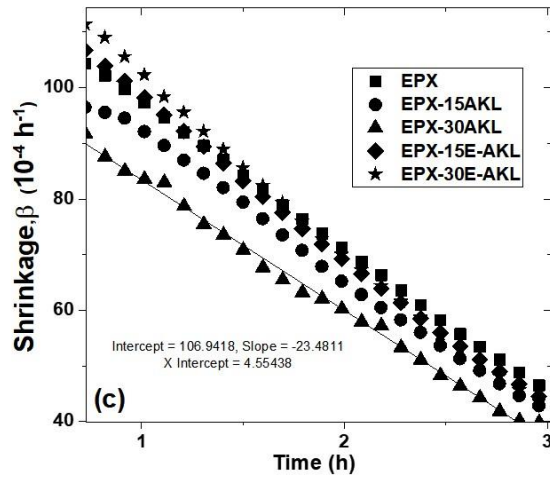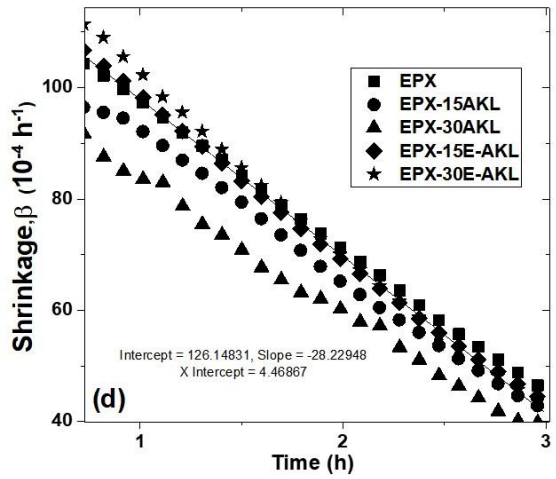

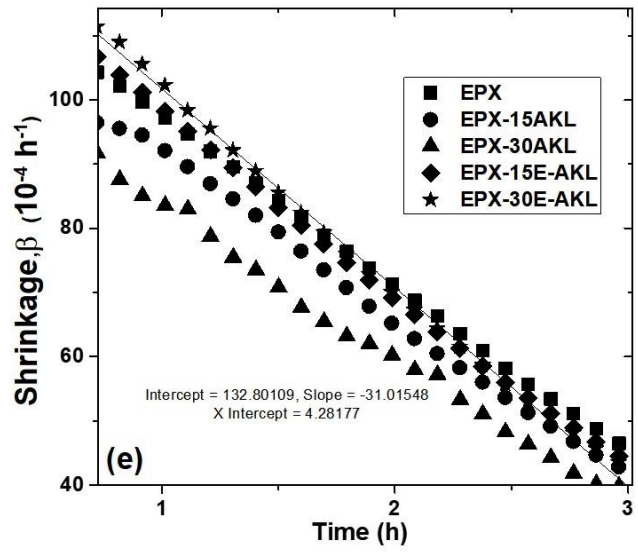

Supplement: molecules-25-02513-s001.pdf [file molecules-25-02513-s001.pdf]
